# Supplementary material
Source: Springer Nature journal article supplement (https://www.springermedizin.de/resource/supplementary/12919_2011_30_MOESM1_ESM.pdf/9654330)
Supplement: MOESM1 [file 9654330]

## Accession numbers of the genes referred in the figures

|                                       |                                               |
|---------------------------------------|-----------------------------------------------|
| <i>Homo sapiens IP6K1</i>             | NP_695005.1                                   |
| <i>Homo sapiens IP6K3</i>             | NP_473452.2                                   |
| <i>Homo sapiens IP6K2</i>             | NP_001005909.1                                |
| <i>Homo sapiens IPMK</i>              | NP_689416.1                                   |
| <i>Homo sapiens IP3KA</i>             | NP_002211.1                                   |
| <i>Homo sapiens IP3KB</i>             | CAB65055.3                                    |
| <i>Homo sapiens IP3KC</i>             | NP_079470.1                                   |
| <i>Drosophila melanogaster mIP6K</i>  | NP_726095.2                                   |
| <i>Drosophila melanogaster IPMK</i>   | NP_608535.1                                   |
| <i>Drosophila melanogaster IP3K</i>   | NP_001096969.1                                |
| <i>Saccharomyces cerevisiae IPMK</i>  | EDN60511.1                                    |
| <i>Saccharomyces cerevisiae IP6K</i>  | CAY78526.1                                    |
| <i>Schizosaccharomyces pombe IPMK</i> | NP_593593.1                                   |
| <i>Schizosaccharomyces pombe IP6K</i> | NP_587847.1                                   |
| <i>Giardia lamblia IP6k</i>           | XP_001706837.1                                |
| <i>Danio rerio IPK1</i>               | XP_692904.2                                   |
| <i>Danio rerio IPK2</i>               | NP_958878.1                                   |
| <i>Danio rerio IPK3</i>               | NP_001002389.2                                |
| <i>Danio rerio IPK4</i>               | NP_001073533.1                                |
| <i>Danio rerio IP3KC</i>              | XP_002665435.1                                |
| <i>Danio rerio IP3KB</i>              | XP_686458.2                                   |
| <i>Danio rerio IPK7</i>               | CAQ14679.1                                    |
| <i>Neurospora crassa IP6K</i>         | XP_956825.1                                   |
| <i>Neurospora crassa IPMK</i>         | XP_962577.2                                   |
| <i>Arabidopsis thaliana IPK2B</i>     | NP_200984.1                                   |
| <i>Arabidopsis thaliana IPK2A</i>     | NP_196354.1                                   |
| <i>Ricinus</i>                        | XP_002511062.1                                |
| <i>Solanum</i>                        | ABO72543.1                                    |
| <i>Avena</i>                          | GR329396.1 (PlantGDB)                         |
| <i>Triticum</i>                       | CK211413.1 (PlantGDB)                         |
| <i>Zea</i>                            | NP_001146961.1                                |
| <i>Oryza</i>                          | NP_001046986.1                                |
| <i>Chlamydomona</i>                   | XM_001694116.1                                |
| <i>Sorgum</i>                         | XP_002452184.1                                |
| <i>Brachypodium</i>                   | Bradi3g44560.1 (from the Brachypodium genome) |
| <i>Phaseolus</i>                      | CAP08583.1                                    |
| <i>Vitis</i>                          | XP_002279587.1                                |
| <i>Glycine</i>                        | ABU93830.1                                    |
| <i>Physcomitrella</i>                 | XP_001757782.1                                |
| <i>Pichia guilliermondii IPMK</i>     | XP_001483490.1                                |
| <i>Pichia guilliermondii KCS1</i>     | EDK38027.2                                    |
| <i>Trypanosoma cruzi KCS1a</i>        | XP_808099.1                                   |
| <i>Trypanosoma cruzi KCS1b</i>        | XP_814212.1                                   |
| <i>Trypanosoma cruzi IPMKa</i>        | XP_818026.1                                   |
